# Supplementary material for: Identifying Potential Antioxidant Properties from the Viscera of Sea Snails (Turbo cornutus)
Source: MDPI journal article supplement (doi:10.3390/md19100567), 2021-10-13
Supplement: s1 [file s1]

## Supplementary materials

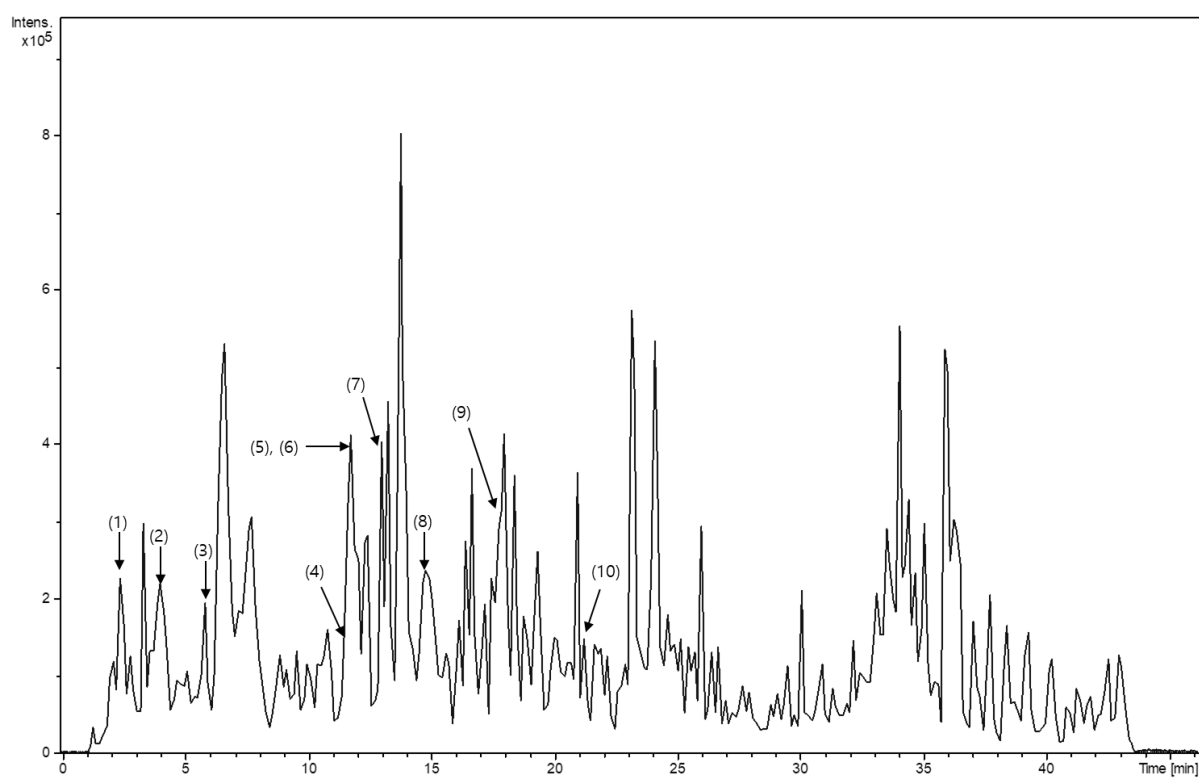

**Figure. S1.** LC-MS/MS chromatogram of TVP-GFC-3

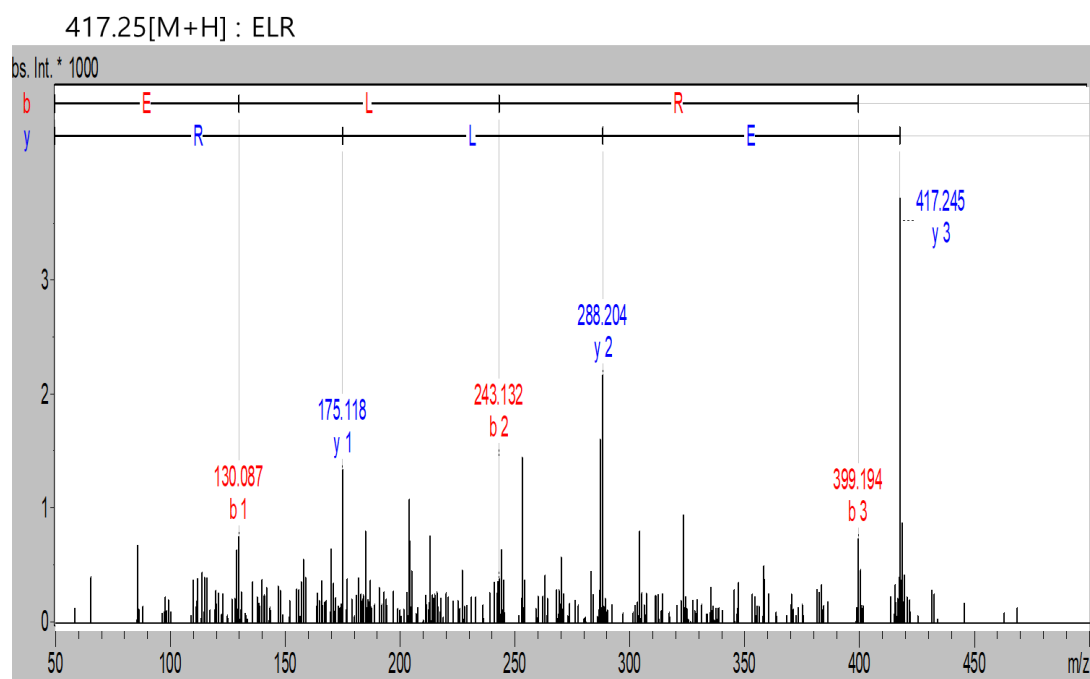

**Figure. S2.** MS/MS sequencing of bioactive peptide, ELR

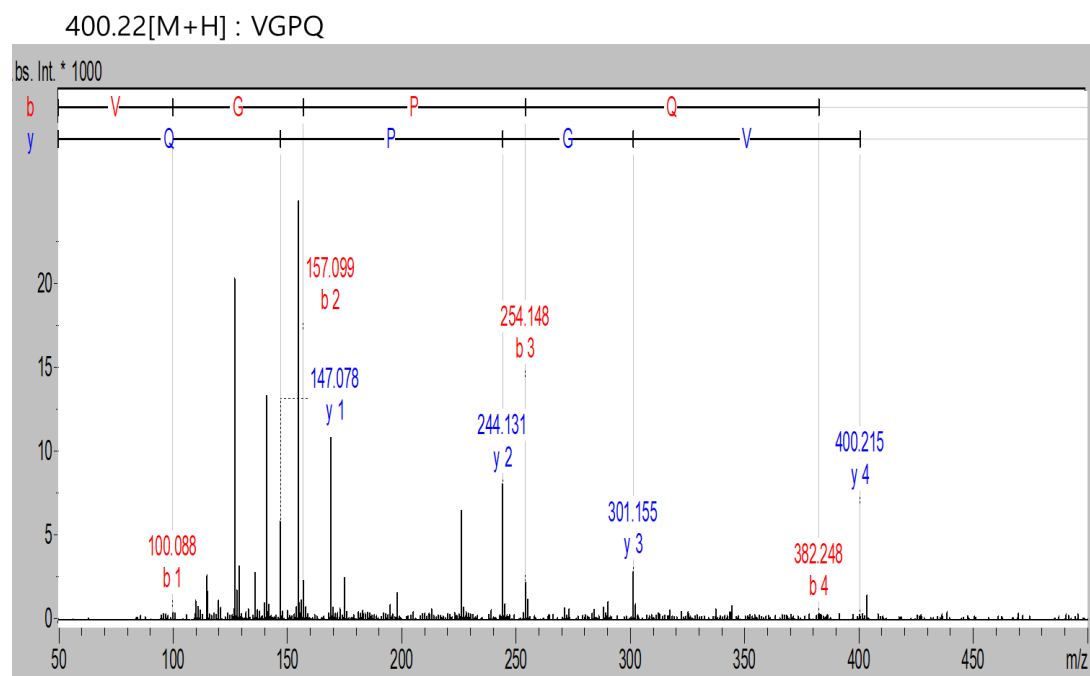

**Figure. S3.** MS/MS sequencing of bioactive peptide, VG PQ

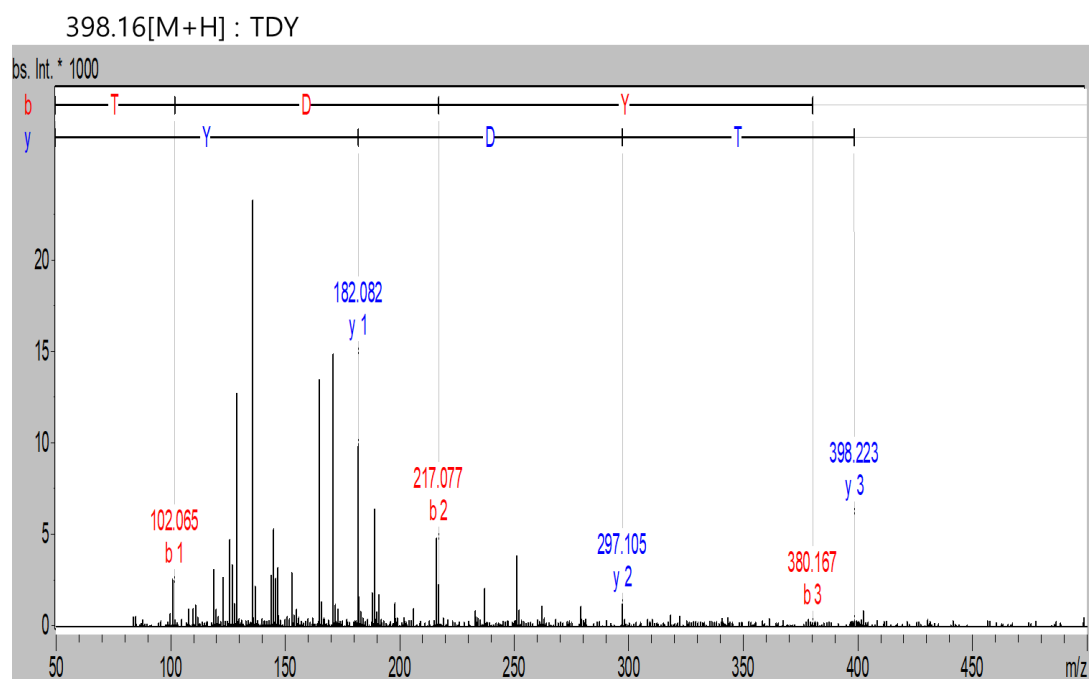

**Figure. S4.** MS/MS sequencing of bioactive peptide, TDY

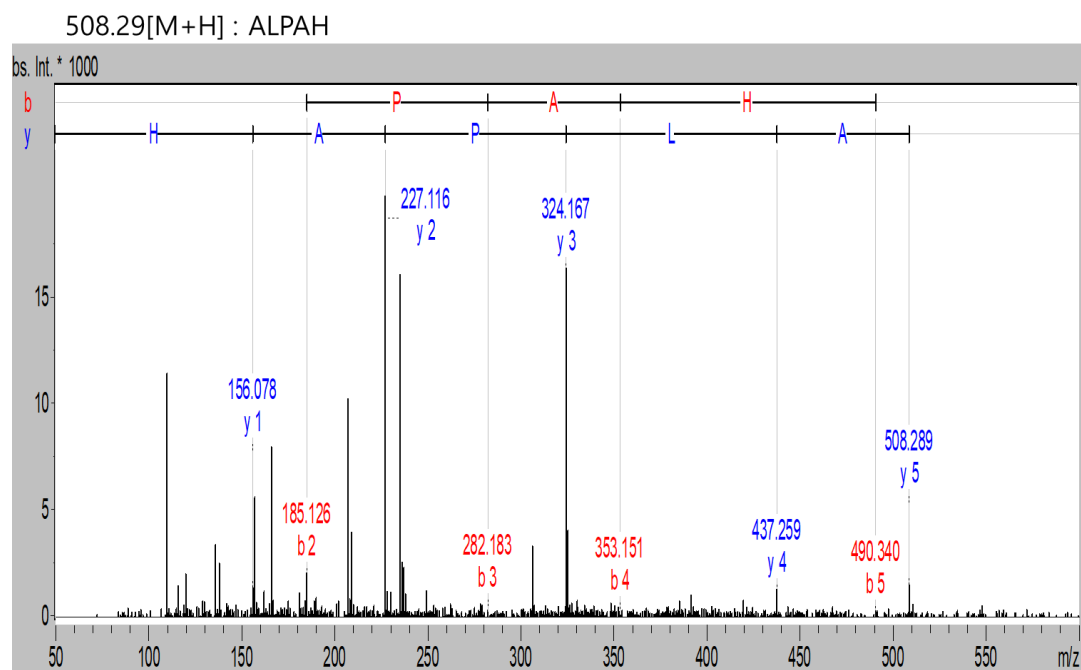

**Figure. S5.** MS/MS sequencing of bioactive peptide, ALPAH

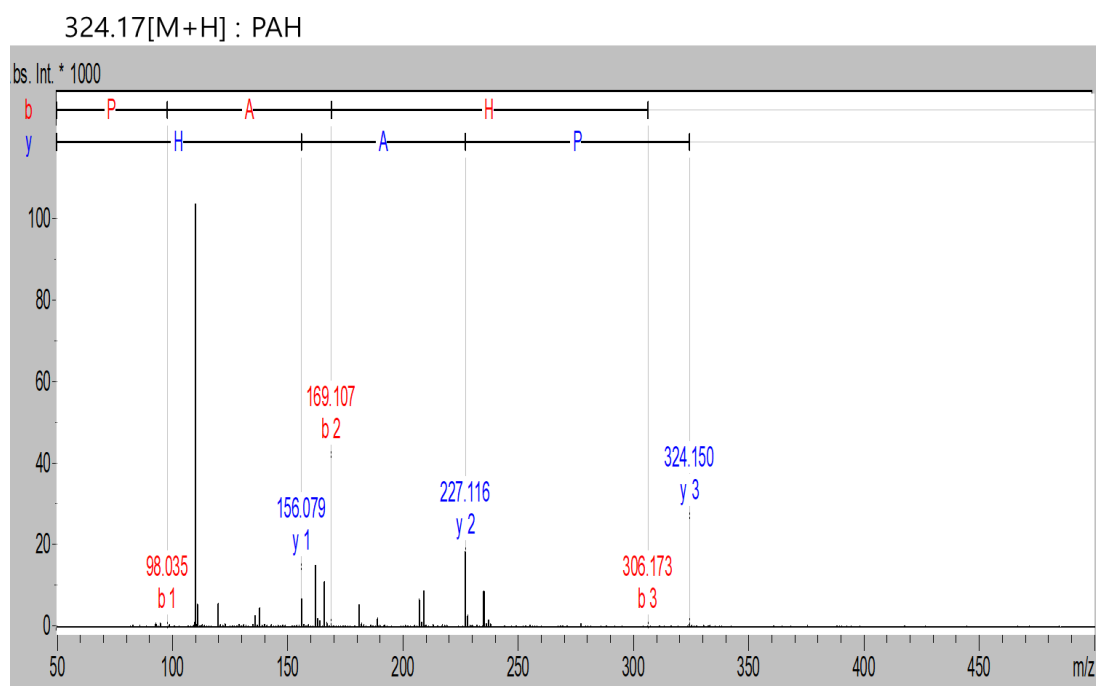

**Figure. S6.** MS/MS sequencing of bioactive peptide, PAH

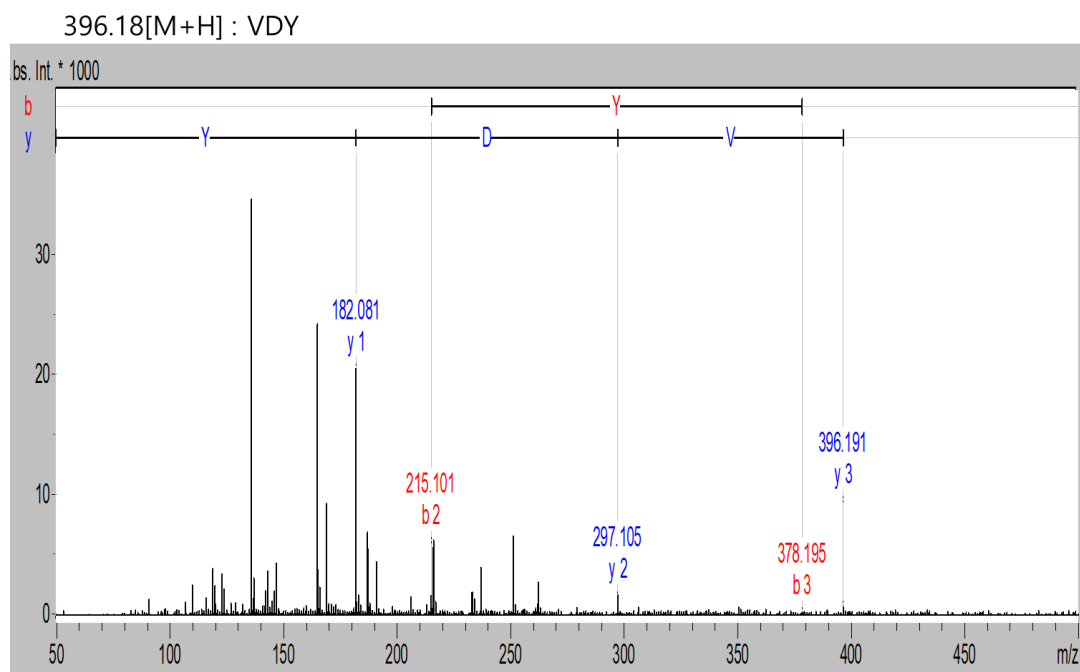

**Figure. S7.** MS/MS sequencing of bioactive peptide, VDY

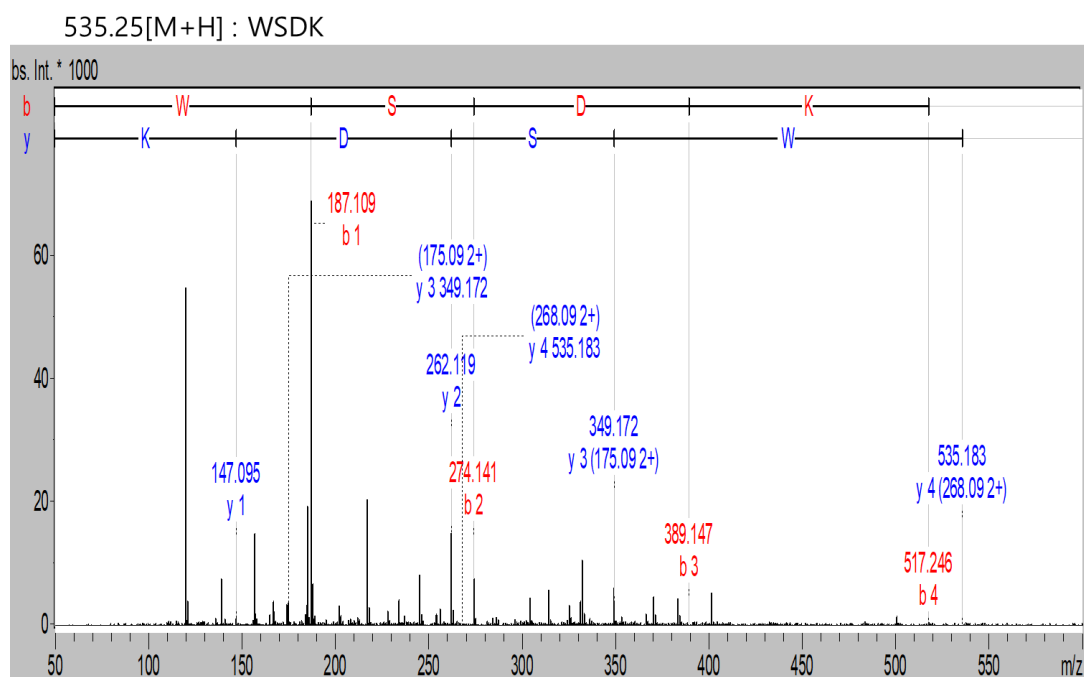

**Figure. S8.** MS/MS sequencing of bioactive peptide, WSDK

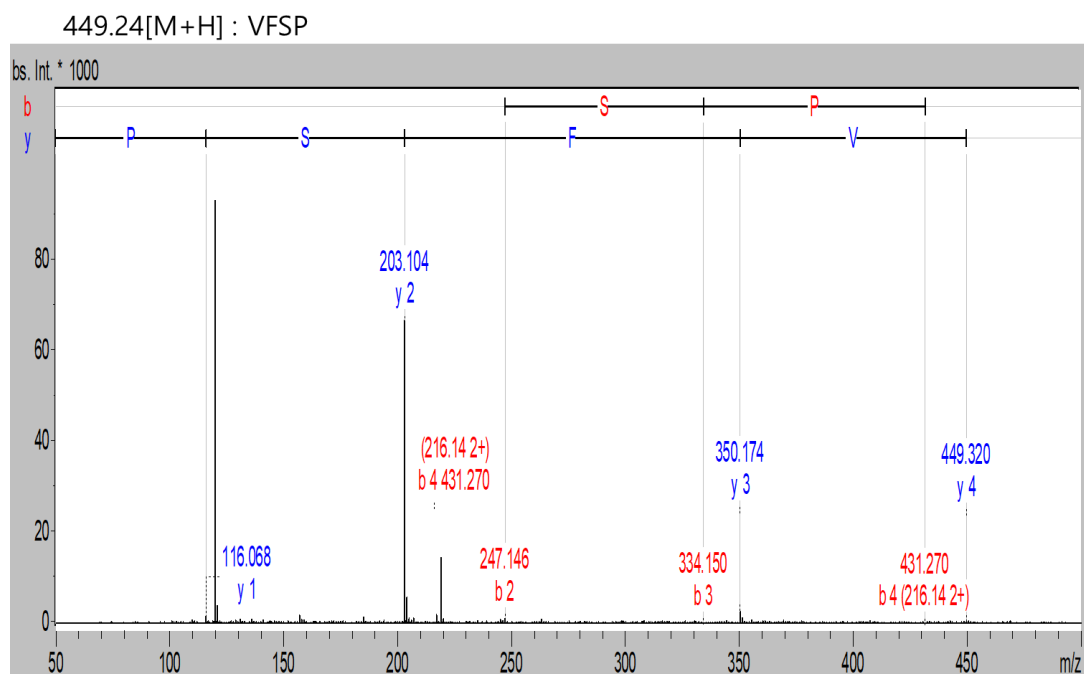

**Figure. S9.** MS/MS sequencing of bioactive peptide, VFSP

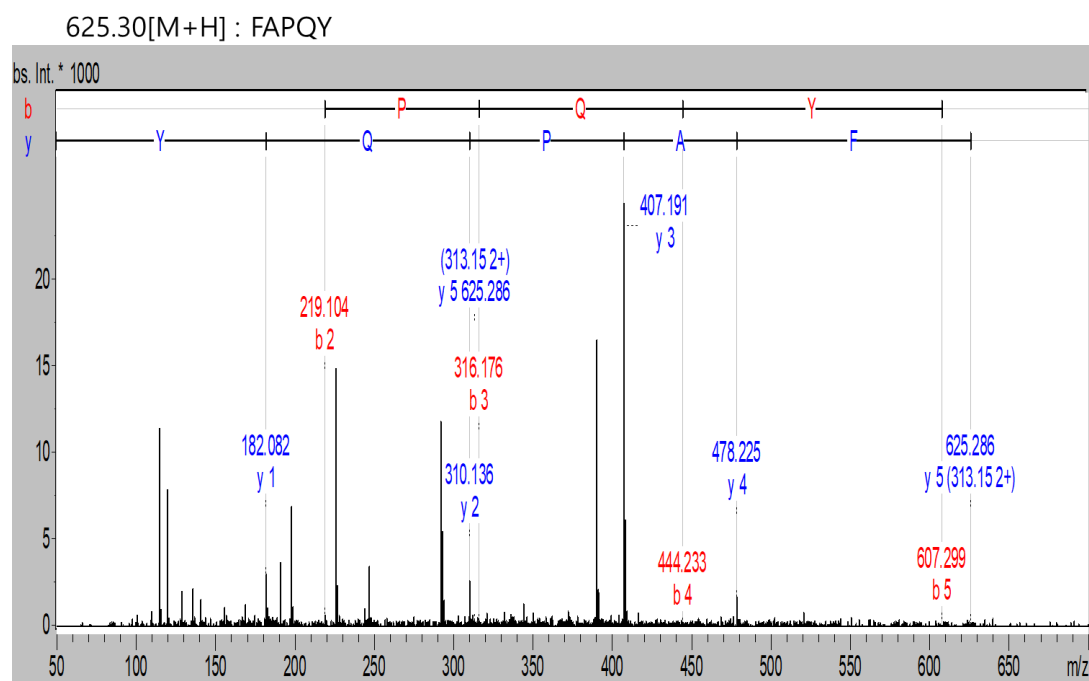

**Figure. S10.** MS/MS sequencing of bioactive peptide, FAPQY
